# Supplementary material
Source: publisher site journal article supplement (https://www.dovepress.com/article/443358)
Supplement: Supplementary file 1 [file get_supplementary_file.php]

Supplementary Material

Lipidomics analysis deepen understanding the molecular mechanisms in a gouty model induced by combination of MSU crystals injection and high-fat diet feeding and the intervention mechanisms of allopurinol

Dianming Li 1, *, Weiman Shi 1, *, Changfeng Hu1,2, Chengping Wen1,2, Lin Huang1,2 #, Qiao Wang1, 2 #

1College of Basic Medical Sciences, Zhejiang Chinese Medical University, Hangzhou City, China; 2Key Laboratory of Chinese medicine rheumatology of Zhejiang Province, Hangzhou City, China

# Correspondence: Lin Huang, College of Basic Medical Sciences, Key Laboratory of Chinese medicine rheumatology of Zhejiang Province, Zhejiang Chinese Medical University, Hangzhou City, Zhejiang Province, People’s Republic of China, Tel + 0571-86613587, Email [huanglin@zcmu.edu.cn](mailto:huanglin@zcmu.edu.cn); Qiao Wang, College of Basic Medical Sciences, Key Laboratory of Chinese medicine rheumatology of Zhejiang Province, Zhejiang Chinese Medical University, Hangzhou City, Zhejiang Province, People’s Republic of China, Tel + 0571-86613587, wangqiao0309@163.com

* These authors contributed equally to this work and share first authorship

**Figure s1**

**
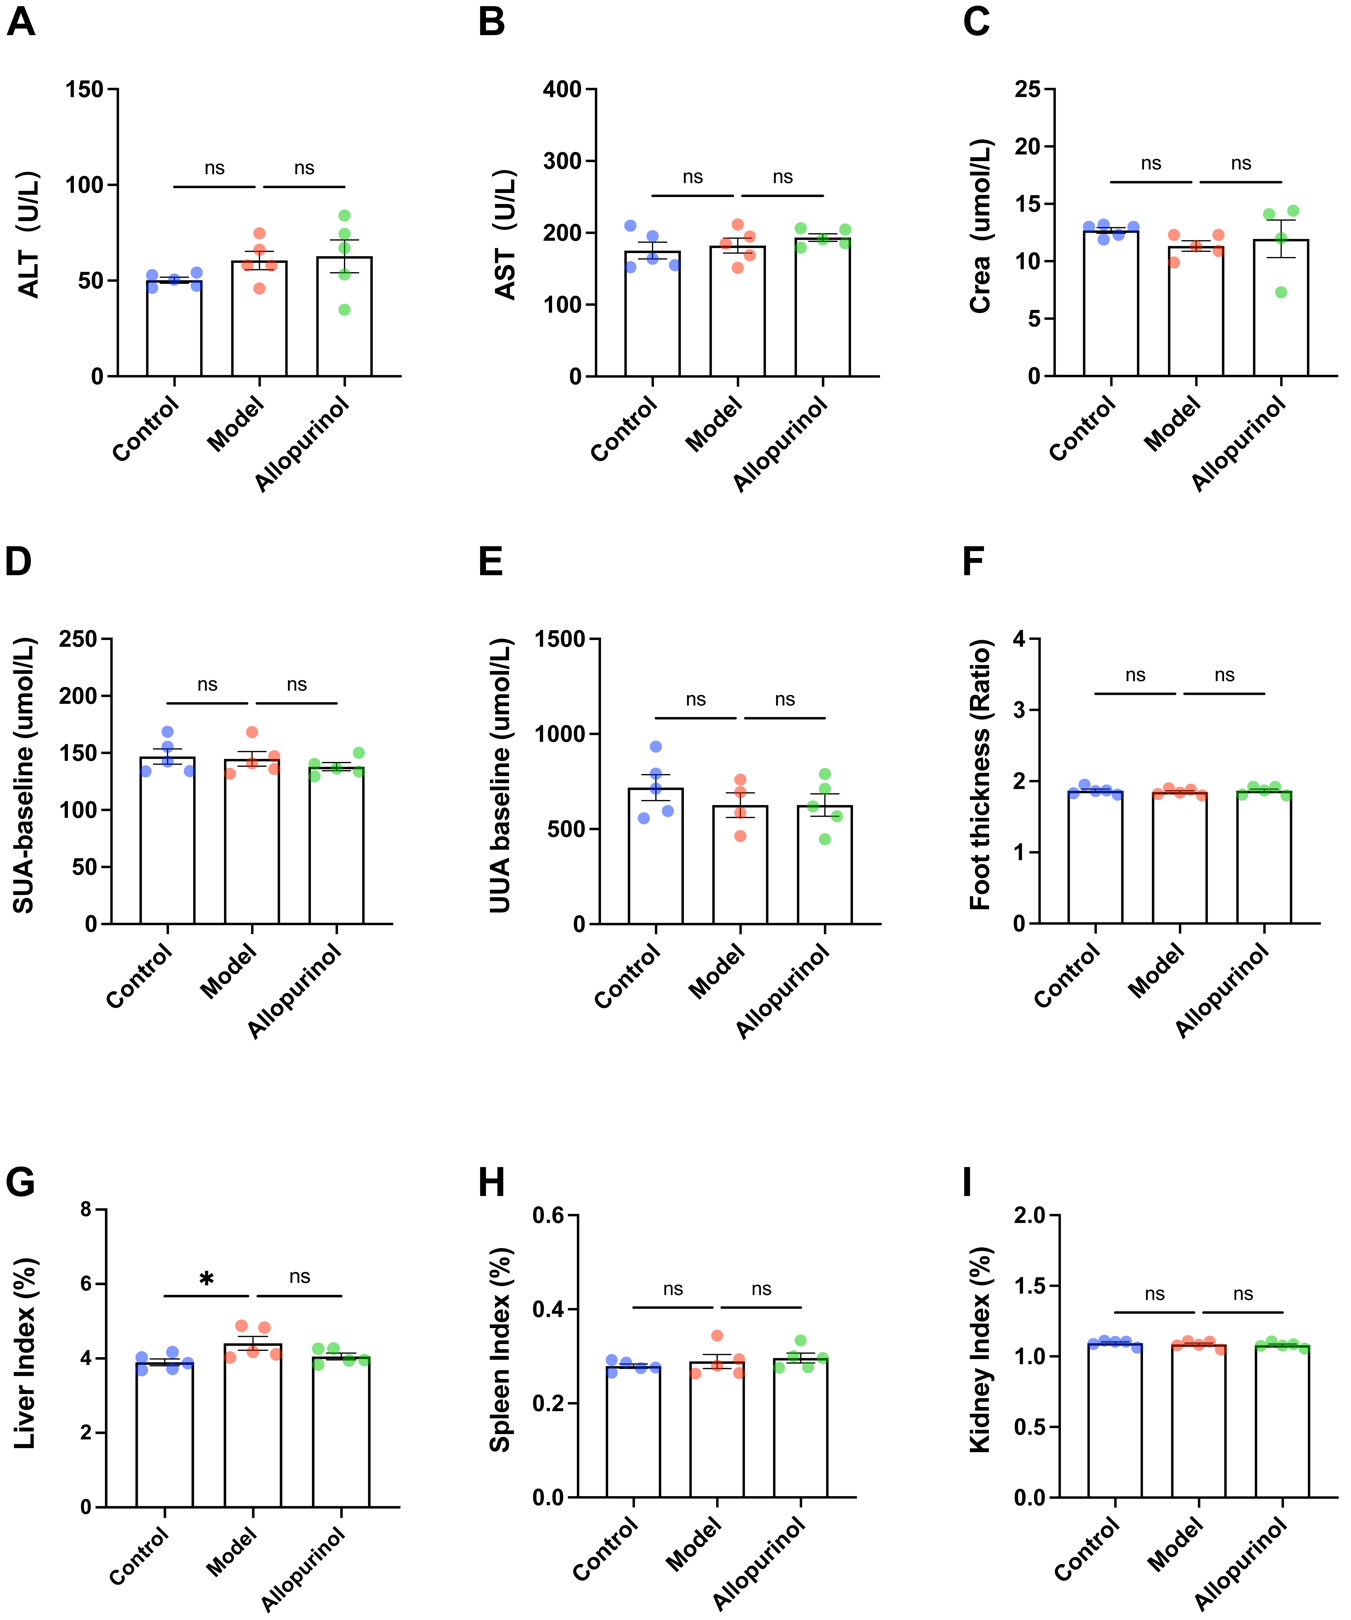
**

**Figure s1** The Baseline data and Visceral index data from gouty mouse and control mouse. After modeling, ALT(A),AST(B), Liver index (G),Spleen index (H) and Kidney index (I) were detected on Day 49. The baseline data of Crea (C), SUA(D),UUA(E) and Foot thickness (F) were observed on Day 3. “ns” represents not significant; “*” represents p < 0.05 compared with those in the control group. The normality of the three groups and the homogeneity of variance between groups were tested using one-way ANOVA. ALT, alanine transaminase ; AST, aspartate transaminase ; Crea, creatine; SUA, serum uric acid; UUA, Urine uric acid; N = 4-5/group.

| Table s1 qPCR amplification primer sequence | | | |
| --- | --- | --- | --- |
|  |  |  |  |
| Gene | Primer sequence (5' to 3') |  | Number of bases |
| TNF-α | F | CAGGCGGTGCCTATGTCTC | 18 |
|  | R | CGATCACCCCGAAGTTCAGTAG | 22 |
| IL-1β | F | GAAATGCCACCTTTTGACAGTG | 22 |
|  | R | TGGATGCTCTCATCAGGACAG | 21 |
| IL6 | F | CTGCAAGAGACTTCCATCCAG | 21 |
|  | R | AGTGGTATAGACAGGTCTGTTGG | 23 |
| β-actin | F | AGCCTTCCTTCTTGGGTATG | 20 |
|  | R | GGTCTTTACGGATGTCAACG | 20 |

| Table s2. The mass levels of individual lipid species in mouse liver analyzed by shotgun lipidomics | | | | | | | | |
| --- | --- | --- | --- | --- | --- | --- | --- | --- |
| Lipds | Mean | | | Mean±SEM | | | M VS C | M VS A |
| SM | Control | Model | Allopurinol | Control | Model | Allopurinol | *p* | *p* |
| N15:0 | 1.318 | 2.488 | 2.724 | 1.318±0.07358 | 2.488 ± 0.1045 | 2.724±0.2594 | 0.0006 | 0.5215 |
| N23:1 | 1.862 | 3.064 | 3.102 | 1.862± 0.1263 | 3.064± 0.1554 | 3.102± 0.4620 | 0.0233 | 0.9938 |
| N23:0 | 2.534 | 4.038 | 6.05 | 2.534± 0.1260 | 4.038± 0.4329 | 6.050± 1.368 | 0.3649 | 0.1923 |
| N18:0 | 1.678 | 2.39 | 2.984 | 1.678 ± 0.08194 | 2.390 ±0.1300 | 2.984 ±0.1511 | 0.0031 | 0.0102 |
| N24:1 | 16.82 | 23.08 | 23.74 | 16.82± 0.8749 | 23.08± 0.9123 | 23.74± 1.354 | 0.0026 | 0.8713 |
| N16:0 | 23.95 | 29.49 | 30.41 | 23.95±1.154 | 29.49 ± 1.699 | 30.41±1.818 | 0.0525 | 0.8873 |
| N22:0 | 7.838 | 6.61 | 5.376 | 7.838 ± 0.2785 | 6.610± 0.3743 | 5.376± 0.3412 | 0.0418 | 0.0409 |
| SM-total | 75.28 | 91.73 | 94.01 | 75.28±3.453 | 91.73±3.821 | 94.01± 6.682 | 0.0614 | 0.9233 |
| Cer | Control | Model | Allopurinol | Control | Model | Allopurinol | *p* | *p* |
| N23:0 | 0.45 | 1.332 | 1.57 | 0.4500 ± 0.05718 | 1.332 ± 0.1066 | 1.570 ± 0.1431 | 0.0002 | 0.2448 |
| N24:1 | 1.124 | 2.514 | 2.458 | 1.124 ± 0.09059 | 2.514 ± 0.1670 | 2.458 ± 0.1905 | <0.0001 | 0.9538 |
| N24:0 | 1.832 | 3.044 | 3.142 | 1.832 ± 0.1881 | 3.044 ± 0.2397 | 3.142 ± 0.5152 | 0.052 | 0.971 |
| OH_N24:2 | 0.272 | 0.36 | 0.266 | 0.2720 ± 0.1134 | 0.3600 ± 0.06301 | 0.2660 ± 0.03763 | 0.6498 | 0.6145 |
| Cer-total | 5.574 | 9.456 | 9.424 | 5.574 ± 0.6103 | 9.456 ±0.4091 | 9.424 ±0.6794 | 0.0009 | 0.9989 |
| PI | Control | Model | Allopurinol | Control | Model | Allopurinol | *p* | *p* |
| 16:0-18:1 | 0.516 | 1.2 | 0.816 | 0.5160± 0.03789 | 1.200± 0.07861 | 0.8160± 0.07004 | <0.0001 | 0.0023 |
| 18:1-18:2 | 1.474 | 2.662 | 1.71 | 1.474± 0.1710 | 2.662± 0.1478 | 1.71± 0.2353 | 0.0015 | 0.0071 |
| 18:0-18:2 | 4.028 | 5.664 | 3.082 | 4.028± 0.1494 | 5.664± 0.8093 | 3.082± 0.7674 | 0.0034 | <0.0001 |
| 18:1-20:4 | 1.57 | 4.098 | 2.944 | 1.570± 0.1837 | 4.098± 0.3497 | 2.944± 0.4004 | 0.0003 | 0.0491 |
| 18:0-20:4 | 15.16 | 22.8 | 20.9 | 15.16± 0.9295 | 22.80± 0.9201 | 20.90± 1.052 | 0.0002 | 0.3147 |
| 18:0-20:3 | 1.93 | 5.18 | 3.512 | 1.930± 0.2228 | 5.180± 0.4223 | 3.512± 0.3450 | <0.0001 | 0.0086 |
| PI-total | 33.74 | 49.91 | 39.31 | 33.74± 2.225 | 49.91± 2.221 | 49.91± 2.317 | 0.0006 | 0.0112 |
| PC | Control | Model | Allopurinol | Control | Model | Allopurinol | *p* | *p* |
| D16:0-18:1 | 25.84 | 39.49 | 32.48 | 25.84± 2.950 | 39.49± 2.933 | 32.48± 2.822 | 0.0112 | 0.1934 |
| D18:1-18:2 | 16.85 | 25.24 | 22.33 | 16.85± 1.414 | 25.24± 1.967 | 22.33± 2.251 | 0.0167 | 0.4762 |
| D16:0-22:6 | 21.93 | 14.34 | 14.24 | 21.93± 1.398 | 14.34± 1.110 | 14.24± 1.020 | 0.0013 | 0.9976 |
| PC-total | 261.9 | 261.9 | 233.1 | 261.9± 18.80 | 261.9± 18.49 | 233.1± 14.23 | >0.9999 | 0.4202 |
| PE | Control | Model | Allopurinol | Control | Model | Allopurinol | *p* | *p* |
| D16:0-18:2 | 2.404 | 1.752 | 2.18 | 2.404± 0.2191 | 1.752± 0.1686 | 2.180± 0.2272 | 0.0807 | 0.2803 |
| P16:0-20:4 | 3.91 | 1.696 | 1.798 | 3.910± 0.2918 | 1.696± 0.07711 | 1.798± 0.1734 | <0.0001 | 0.9112 |
| D16:0-20:4 | 2.798 | 1.522 | 2.248 | 2.798± 0.2645 | 1.522± 0.1410 | 2.248± 0.2847 | 0.0049 | 0.0928 |
| P16:0-22:6 | 7.696 | 3.202 | 3.626 | 7.696± 0.2476 | 3.202± 0.1813 | 3.626± 0.3715 | <0.0001 | 0.4746 |
| P18:1-20:4 | 5.412 | 2.434 | 2.934 | 5.412± 0.2336 | 2.434± 0.1209 | 2.934± 0.2576 | <0.0001 | 0.2074 |
| P18:0-20:4 | 6.176 | 2.46 | 2.758 | 6.176± 0.2602 | 2.460± 0.1393 | 2.758± 0.2925 | <0.0001 | 0.5978 |
| P18:0-20:3 | 3.054 | 2.028 | 2.626 | 3.054± 0.2338 | 2.028± 0.07179 | 2.626± 0.3369 | 0.0196 | 0.1782 |
| D16:0-22:6 | 3.824 | 1.55 | 2.538 | 3.824± 0.3736 | 1.550± 0.1886 | 2.538± 0.2459 | 0.0002 | 0.0509 |
| P18:0-22:6 | 7.228 | 3.224 | 4.144 | 7.228± 0.2237 | 3.224± 0.1417 | 4.144± 0.5049 | <0.0001 | 0.1248 |
| P18:0-22:5 | 6.124 | 3.182 | 4.444 | 6.124± 0.2102 | 3.182± 0.2086 | 4.444± 0.4787 | <0.0001 | 0.0323 |
| P18:0-22:4 | 3.716 | 1.182 | 1.498 | 3.716± 0.09673 | 1.182± 0.05014 | 1.498± 0.1658 | <0.0001 | 0.1303 |
| A20:0-20:4 | 2.824 | 1.472 | 1.84 | 2.824± 0.1540 | 1.472± 0.08157 | 1.840± 0.2236 | 0.0002 | 0.2324 |
| PE-total | 101.7 | 53.09 | 70.11 | 101.7± 3.245 | 53.09± 3.032 | 70.11± 4.925 | <0.0001 | 0.0157 |
| Car | Control | Model | Allopurinol | Control | Model | Allopurinol | *p* | *p* |
| 14:1 | 53.03 | 121.7 | 133.6 | 53.03± 6.391 | 121.7± 19.73 | 133.6± 15.88 | 0.0136 | 0.8015 |
| 16:1 | 63.39 | 111.8 | 105.9 | 63.39± 8.461 | 111.8± 14.01 | 105.9± 8.549 | 0.0138 | 0.8951 |
| 18:1 | 159.4 | 331.3 | 368.3 | 159.4± 19.56 | 331.3± 28.29 | 368.3± 28.36 | 0.001 | 0.5116 |
| 18:0 | 32.95 | 64.18 | 74.03 | 32.95± 3.347 | 64.18± 4.327 | 74.03± 5.078 | 0.0005 | 0.2234 |
| 20:1 | 13.71 | 21.72 | 14.97 | 13.71± 1.438 | 21.72± 1.504 | 14.97± 0.7316 | 0.0015 | 0.0052 |
| Car-total | 748.8 | 1205 | 1265 | 748.8± 48.19 | 1205± 74.28 | 1265± 88.48 | 0.0015 | 0.7856 |
| HNE | Control | Model | Allopurinol | Control | Model |  | *p* | *p* |
| 4-hydroxy hexenal - Carnosine (HHE) | 0.294 | 0.18 | 0.186 | 0.2940± 0.02502 | 0.1800± 0.02074 | 0.1860± 0.02542 | 0.0101 | 0.977 |
| 4-hydroxy nondinenal - Carnosine (HNDE) | 0.074 | 0.032 | 0.058 | 0.07400± 0.01030 | 0.03200± 0.006633 | 0.05800± 0.01855 | 0.0698 | 0.2939 |
| HNE-total | 0.566 | 0.354 | 0.372 | 0.5660± 0.04190 | 0.3540± 0.02977 | 0.3720± 0.05553 | 0.0092 | 0.9403 |
| TAG | Control | Model | Allopurinol | Control | Model | Allopurinol | *p* | *p* |
| C50:3/C51:10 | 26.6 | 6.594 | 3.942 | 26.60± 4.283 | 6.594± 0.4388 | 3.942± 0.6497 | 0.0002 | 0.6838 |
| C50:2/C51:9 | 48.49 | 14.12 | 6.706 | 48.49± 8.276 | 14.12± 1.310 | 6.706± 1.281 | 0.0006 | 0.478 |
| C52:5 | 18.71 | 3.048 | 2.228 | 18.71± 1.863 | 3.048± 0.1961 | 2.228± 0.4578 | <0.0001 | 0.8254 |
| C52:4/C53:11 | 69.76 | 11.48 | 6.91 | 69.76± 6.721 | 11.48± 0.5823 | 6.910± 1.908 | <0.0001 | 0.6496 |
| C52:3/C53:10 | 122.9 | 33.92 | 18.14 | 122.9± 11.39 | 33.92± 2.053 | 18.14± 5.339 | <0.0001 | 0.2594 |
| C52:2/C53:9 | 90.59 | 44.16 | 21.97 | 90.59± 11.02 | 44.16± 3.556 | 21.97± 5.498 | 0.0015 | 0.0979 |
| C54:6 | 33.98 | 4.336 | 3.664 | 33.98± 4.775 | 4.336± 0.2181 | 3.664± 0.5737 | <0.0001 | 0.9788 |
| C54:5/C55:12 | 44.63 | 8.914 | 6.022 | 44.63± 6.555 | 8.914± 0.4854 | 6.022± 1.150 | 0.0006 | 0.8195 |
| C54:4/C55:11 | 41.59 | 18.26 | 10.07 | 41.59± 4.888 | 18.26± 1.296 | 10.07± 1.900 | 0.0017 | 0.1524 |
| C55:1/C56:8 | 18.8 | 3.938 | 3.106 | 18.80± 0.9185 | 3.938± 0.2775 | 3.106± 0.3987 | <0.0001 | 0.5331 |
| C55:0/C56:7 | 21.96 | 5.474 | 5.024 | 21.96± 0.9033 | 5.474± 0.3034 | 5.024± 0.6950 | <0.0001 | 0.8559 |
| TAG-total | 637.2 | 237.1 | 136.5 | 637.2± 69.66 | 237.1± 16.91 | 136.5± 23.92 | <0.0001 | 0.2187 |
| FA | Control | Model | Allopurinol | Control | Model | Allopurinol | *p* | *p* |
| 254(16:1) | 105.8 | 35.42 | 19.86 | 105.8± 16.15 | 35.42± 2.707 | 19.86± 4.069 | 0.0005 | 0.4447 |
| 256(16:0) | 527.9 | 161.4 | 90.07 | 527.9± 58.94 | 161.4± 11.71 | 90.07± 17.85 | <0.0001 | 0.3113 |
| 278(18:3) | 33.88 | 8.41 | 5.552 | 33.88± 4.041 | 8.410± 0.6193 | 5.552± 0.7979 | <0.0001 | 0.6223 |
| 280(18:2) | 413.1 | 86.31 | 50.22 | 413.1± 49.45 | 86.31± 5.614 | 50.22± 11.56 | <0.0001 | 0.6063 |
| 282(18:1) | 539.8 | 263.8 | 21.16 | 539.8± 62.13 | 263.8± 21.16 | 21.16± 30.84 | 0.0011 | 0.0746 |
| 304(20:4) | 28.29 | 10.56 | 10.33 | 28.29± 1.734 | 10.56± 0.7130 | 10.33± 1.500 | <0.0001 | 0.9905 |
| 310(20:1) | 34.16 | 15.19 | 9.04 | 34.16± 3.397 | 15.19± 1.045 | 9.040± 1.314 | 0.0001 | 0.1223 |
| 328(22:6) | 29.4 | 6.586 | 6.144 | 29.40± 1.538 | 6.586± 0.5911 | 6.144± 0.4728 | <0.0001 | 0.9303 |
| 334(22:3) | 19.7 | 5.568 | 5.208 | 19.7± 0.6183 | 5.568± 0.8943 | 5.208± 0.4945 | <0.0001 | 0.8436 |
| FA-total | 1912 | 711.2 | 409.6 | 1912± 209.0 | 711.2± 50.73 | 409.6± 71.76 | <0.0001 | 0.2187 |
